# Supplementary material for: A Machine Learning Algorithm for Quantitatively Diagnosing Oxidative Stress Risks in Healthy Adult Individuals Based on Health Space Methodology: A Proof-of-Concept Study Using Korean Cross-Sectional Cohort Data
Source: MDPI journal article supplement (doi:10.3390/antiox10071132), 2021-07-16
Supplement: s1 [file s1]

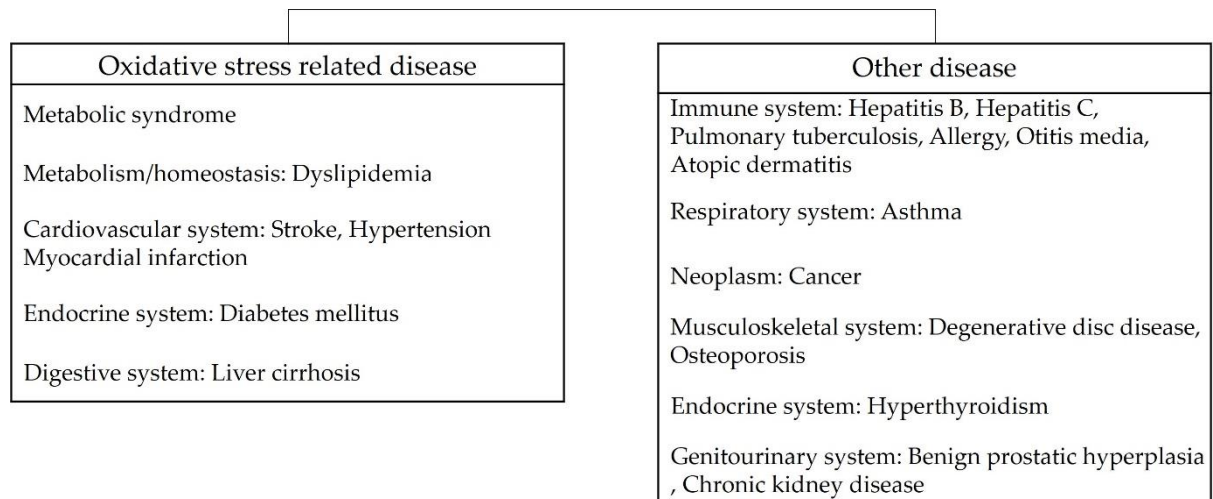

**Figure S1.** Classification of oxidative stress-related disease

(A)

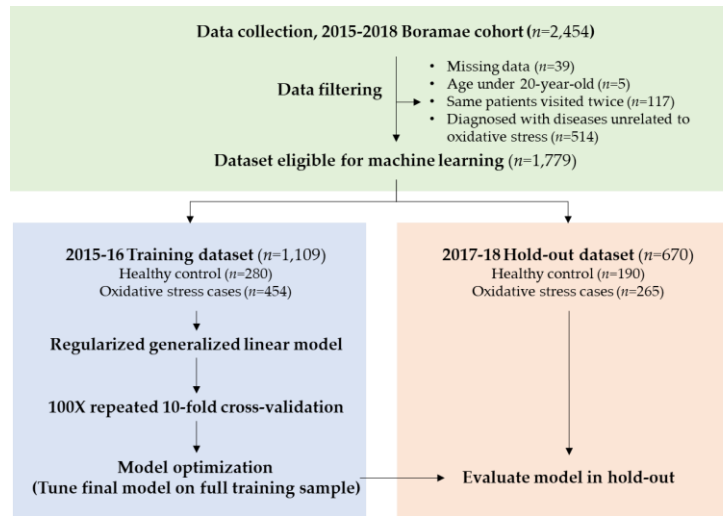

(B)

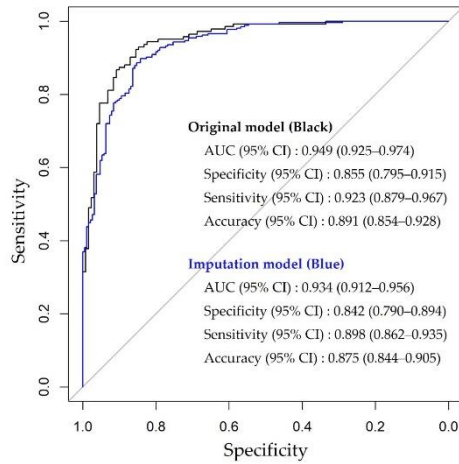

Selected features:

Age, Plasma MDA, BMI, RFS, HbA1c,  
GPT, GGT, Bilirubin, Albumin, WBC,  
RBC, Hb, RDW, Monocytes, Basophils,  
MCHC

(C)

(A) Internal validation (training dataset)

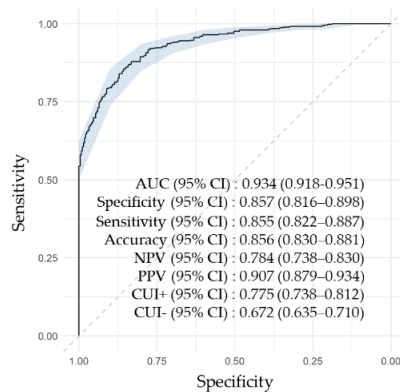

(B) External validation (holdout dataset)

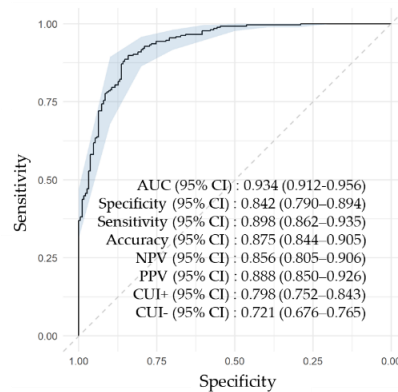

**Figure S2.** Analysis of missing data. (A) the schematic of the analysis, (B) selected features and performance test using receiver operating characteristic curve of best performing model, compared with the original model ( $p=0.376$ ), and (C) internal and external validation. The diagonal line represents the reference line of 0.5. AUC, area under the curve; CI, confidence interval.

**Table S1.** Comparison of healthy controls in the training set and those in the hold-out set.

| Features                         | Normal range                        | Healthy controls                               |                                                | <i>p</i> -value |
|----------------------------------|-------------------------------------|------------------------------------------------|------------------------------------------------|-----------------|
|                                  |                                     | 2015–2016<br>Training set<br>( <i>n</i> = 248) | 2017–2018<br>Hold-out set<br>( <i>n</i> = 131) |                 |
| General characteristics (10)     |                                     |                                                |                                                |                 |
| Age (years)                      | -                                   | 42.7 ± 10.4                                    | 38.3 ± 10.0                                    | 0.0001          |
| Sex (males; <i>n</i> , %)        | -                                   | 101 (40.7)                                     | 47 (35.9)                                      | 0.358           |
| Current smoker <i>n</i> (%)      | -                                   | 23 (9.3)                                       | 5 (3.8)                                        | 0.053           |
| Smoking duration (years)         | -                                   | 4.5 ± 9.0                                      | 3.1 ± 6.8                                      | 0.091           |
| Smoking pack-year                | -                                   | 3.3 ± 7.6                                      | 2.4 ± 6.4                                      | 0.215           |
| Current drinker <i>n</i> (%)     | -                                   | 145 (58.5)                                     | 78 (59.5)                                      | 0.840           |
| Recommended food score           | -                                   | 21.6 ± 8.3                                     | 20.5 ± 8.7                                     | 0.215           |
| Physical activity (min/day)      | -                                   | 128.5 ± 120.1                                  | 119.2 ± 113.8                                  | 0.465           |
| Body mass index (kg/m²)          | -                                   | 21.5 ± 2.2                                     | 21.2 ± 2.2                                     | 0.261           |
| Body fat (%)                     | -                                   | 25.5 ± 6.4                                     | 26.0 ± 6.4                                     | 0.417           |
| Biochemical characteristics (14) |                                     |                                                |                                                |                 |
| Albumin (g/dL)                   | 3.5-5.2                             | 4.3 ± 0.2                                      | 4.4 ± 0.2                                      | 0.001           |
| Alkaline phosphatase (IU/L)      | 44-147                              | 62.5 ± 17.8                                    | 62.3 ± 17.2                                    | 0.908           |
| Bilirubin (mg/dL)                | 0.1-1.2                             | 1.2 ± 0.5                                      | 1.1 ± 0.4                                      | 0.101           |
| Blood urea nitrogen (mg/dL)      | 8-23                                | 12.8 ± 3.5                                     | 11.6 ± 2.8                                     | 0.0004          |
| Creatinine (μmol/L)              | Male: 61.9-114.9<br>Female: 53-97.2 | 68.2 ± 14.1                                    | 66.1 ± 12.6                                    | 0.154           |
| C-reactive protein (mg/dL)       | 0-3                                 | 0.1 ± 0.2                                      | 0.1 ± 0.3                                      | 0.787           |
| γ-Glutamyl transferase (IU/L)    | 0-30                                | 18.4 ± 15.0                                    | 17.7 ± 13.7                                    | 0.662           |
| GOT (IU/L)                       | Male 0-40<br>Female 0-32            | 22.6 ± 6.8                                     | 26.7 ± 56.0                                    | 0.405           |
| GPT (IU/L)                       | Male 0-41<br>Female 0-33            | 18.9 ± 12.0                                    | 18.6 ± 12.3                                    | 0.810           |
| Glycosylated hemoglobin (%)      | 0-5.7                               | 5.4 ± 0.3                                      | 5.3 ± 0.3                                      | 0.008           |
| LDL-C (mmol/L)                   | 0-3.5                               | 3.0 ± 0.7                                      | 3.0 ± 0.7                                      | 0.971           |
| Total cholesterol (mmol/L)       | 0-5.18                              | 5.0 ± 0.8                                      | 5.0 ± 0.8                                      | 0.457           |
| Total protein (g/dL)             | 6.4-8.3                             | 7.1 ± 0.4                                      | 7.2 ± 0.3                                      | 0.002           |
| Uric acid (mg/dL)                | Male: 2.4-6.0<br>Female: 3.4-7.0    | 4.8 ± 1.2                                      | 4.7 ± 1.1                                      | 0.691           |
| Complete blood count data (16)   |                                     |                                                |                                                |                 |
| Basophils (%)                    | 0.0-2.0                             | 0.4 ± 0.3                                      | 0.5 ± 0.3                                      | 0.154           |
| Eosinophils (%)                  | 1.0-6.0                             | 2.6 ± 2.2                                      | 2.7 ± 2.0                                      | 0.800           |
| ESR (mm/h)                       | Male: 0-22<br>Female: 0-29          | 9.0 ± 8.2                                      | 9.4 ± 11.9                                     | 0.731           |
| Hematocrit (%)                   | Male: 39-52<br>Female: 36-48        | 41.4 ± 4.2                                     | 42.7 ± 3.7                                     | 0.003           |
| Hemoglobin (g/dL)                | Male: 13-17<br>Female: 12-16        | 13.9 ± 1.6                                     | 14.2 ± 1.5                                     | 0.099           |
| Lymphocytes (%)                  | 17.0-46.0                           | 35.3 ± 8.8                                     | 36.4 ± 7.9                                     | 0.224           |
| MCH (pg)                         | Male: 27-33<br>Female: 26-32        | 30.3 ± 1.9                                     | 30.0 ± 1.9                                     | 0.208           |
| MCHC (g/dL)                      | 30.0-35.0                           | 33.5 ± 1.0                                     | 33.2 ± 0.9                                     | 0.001           |
| MCV (fL)                         | Male: 81-96<br>Female: 79-95        | 90.4 ± 4.4                                     | 90.6 ± 4.7                                     | 0.647           |
| Monocytes (%)                    | 2.0-8.0                             | 5.7 ± 1.5                                      | 5.8 ± 1.4                                      | 0.736           |
| Neutrophils (%)                  | 38.0-78.0                           | 56.0 ± 9.7                                     | 54.7 ± 8.4                                     | 0.201           |

|                                                                 |                                      |                  |                  |       |
|-----------------------------------------------------------------|--------------------------------------|------------------|------------------|-------|
| Platelets ( $\times 10^3/\mu\text{L}$ )                         | 130-400                              | 249.1 $\pm$ 51.9 | 258.5 $\pm$ 54.0 | 0.101 |
| Platelet distribution width (%)                                 | 8.3-56.6                             | 11.8 $\pm$ 1.6   | 11.8 $\pm$ 1.5   | 0.734 |
| Red blood cell count ( $\times 10^6/\mu\text{L}$ )              | Male: 4.2-6.3<br>Female: 4.0-5.4     | 4.6 $\pm$ 0.4    | 4.7 $\pm$ 0.4    | 0.004 |
| RDW (%)                                                         | Male: 12.2-16.1<br>Female: 11.8-14.5 | 13.1 $\pm$ 1.0   | 13.1 $\pm$ 1.1   | 0.998 |
| White blood cell count ( $\times 10^3/\mu\text{L}$ )            | 4.0-10.0                             | 5.2 $\pm$ 1.3    | 5.2 $\pm$ 1.3    | 0.959 |
| <b>High-performance liquid chromatography analysis data (3)</b> |                                      |                  |                  |       |
| Plasma MDA (mM)                                                 | -                                    | 4.4 $\pm$ 2.4    | 4.3 $\pm$ 2.2    | 0.622 |
| Erythrocyte MDA (mM)                                            | -                                    | 6.1 $\pm$ 6.2    | 8.8 $\pm$ 8.6    | 0.002 |
| Urine MDA (mM)                                                  | -                                    | 2.9 $\pm$ 1.8    | 2.7 $\pm$ 1.7    | 0.369 |

Values are mean  $\pm$  SD or number (percentage). Differences between the groups were compared using Student's *t*-test for continuous variables and Chi-square tests for categorical variables. AP, alkaline phosphatase; BMI, body mass index; BUN, blood urea nitrogen; CRP, C-reactive protein; GOT, glutamate oxaloacetate transaminase; GPT, glutamate pyruvate transaminase; GT,  $\gamma$ -Glutamyl transferase; LDL-C, low-density lipoprotein cholesterol; ESR, erythrocyte sedimentation rate; MCH, mean corpuscular hemoglobin; MCHC, mean corpuscular hemoglobin concentration; MCV, mean corpuscular volume; MDA, malondialdehyde; PDW, platelet distribution width; RDW, red blood cell distribution width; RFS, recommended food score; TC, total cholesterol.
